# Supplementary material
Source: PubMed Central journal article supplement (PMC2464348)

Supplemental: **Figure. Optic nerve and fundus after ONTx**

**A.** Complete transection of the optic nerve was confirmed using a silvered lens expressor behind the transected nerve while transilluminating the optic nerve.

**B.** Unchanged blood vessels in the fundus viewed under the operating microscope post-operatively.

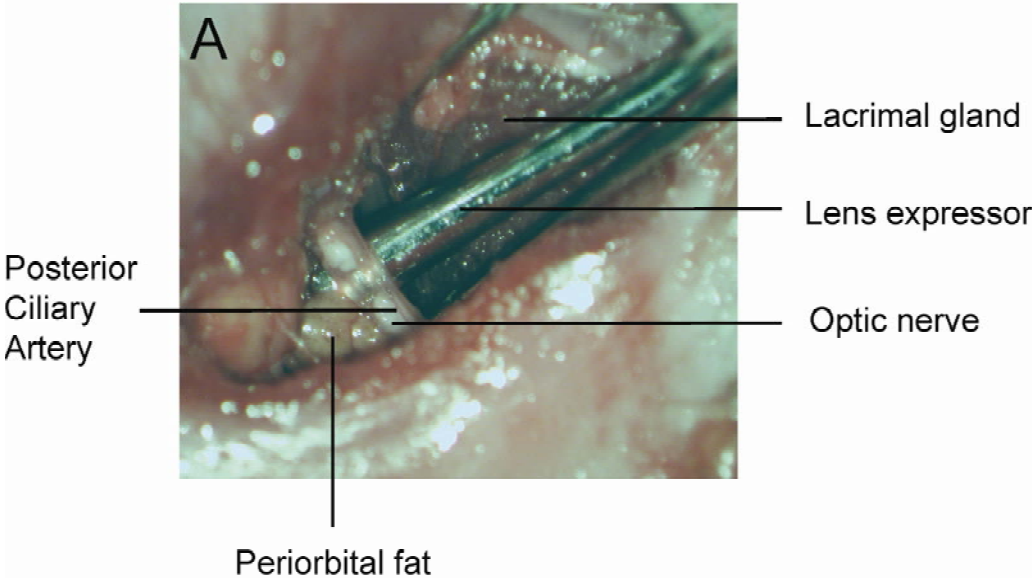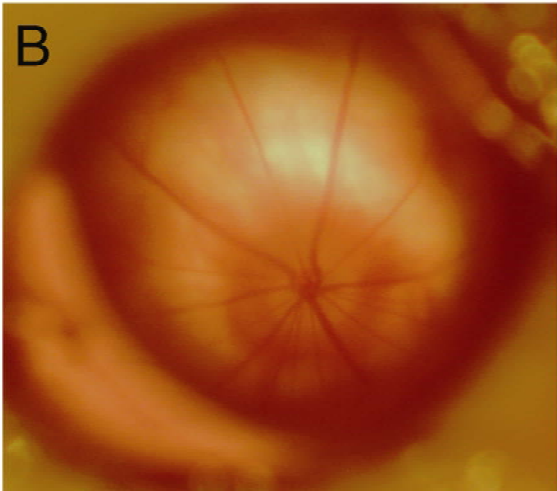

Supplement: 2008.150755_1.pdf [file 2008.150755_1.pdf]
